# Supplementary material
Source: PubMed Central journal article supplement (PMC9465986)
Supplement: NIHMS1786678-supplement-Supp1.pdf [file NIHMS1786678-supplement-Supp1.pdf]

## Supplemental Figure. Derivation of the Study Population

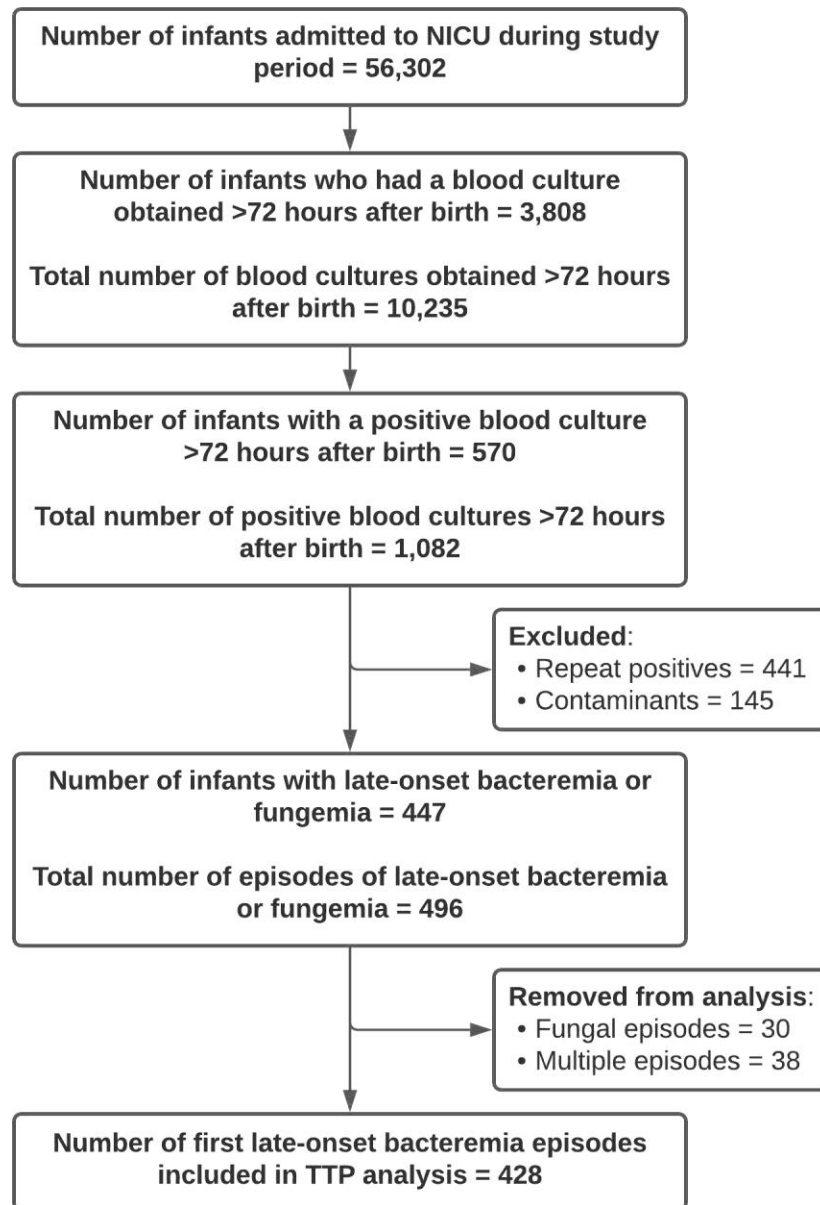

*NICU*, neonatal intensive care unit; *TTP*, time to positivity.

**Supplemental Table 1. Demographics and Clinical Characteristics of Infants with Late-Onset Bacteremia or Fungemia Episode**

| Characteristics                                                 | N = 447         |
|-----------------------------------------------------------------|-----------------|
| Gestational age (weeks), median (Q1, Q3)                        | 26 (24, 29)     |
| Birth weight (grams), median (Q1, Q3)                           | 830 (660, 1250) |
| Sex (male), n (%)                                               | 258 (57.7)      |
| Race/ethnicity, n (%)                                           |                 |
| Black/Non-Hispanic                                              | 70 (15.7)       |
| White/Non-Hispanic                                              | 73 (16.3)       |
| Asian                                                           | 99 (22.2)       |
| Hispanic                                                        | 78 (17.5)       |
| Other/Unknown                                                   | 112 (25.1)      |
| Study center, n (%)                                             |                 |
| KPNC                                                            | 295 (66.0)      |
| PAH                                                             | 152 (34.0)      |
| Age at 1st late-onset infection episode (days), median (Q1, Q3) | 14 (9, 24)      |
| Late-onset infection episodes per infant, n (%)                 |                 |
| 1                                                               | 405 (90.6)      |
| 2                                                               | 37 (8.3)        |
| 3+                                                              | 5 (1.1)         |

**Footnotes:** *KPNC*, Kaiser Permanente Northern California; *PAH*, Pennsylvania Hospital; *Q1*, first quartile; *Q3*, third quartile.

**Supplemental Table 2. Organisms Deemed as Contaminants**

| <b>Organisms</b>                          | <b>N = 145</b> |
|-------------------------------------------|----------------|
| CoNS                                      | 122            |
| <i>Streptococcus mitis</i>                | 4              |
| <i>Bacillus</i> sp.                       | 3              |
| <i>Micrococcus</i> sp.                    | 2              |
| <i>Neisseria</i> sp.                      | 2              |
| <i>Staphylococcus aureus</i> <sup>1</sup> | 2              |
| Alpha-Hemolytic <i>Streptococcus</i> sp.  | 1              |
| <i>Bifidobacterium</i> sp.                | 1              |
| <i>Candida albicans</i>                   | 1              |
| Diphtheroids                              | 1              |
| Gram-positive rods                        | 1              |
| <i>Granulicatella</i> sp.                 | 1              |
| <i>Leuconostoc</i> sp.                    | 1              |
| <i>Propionibacterium</i> sp.              | 1              |
| <i>Stomatococcus</i> sp.                  | 1              |
| <i>Wautersia paucula</i>                  | 1              |

**Footnotes:** <sup>1</sup>Includes 1 methicillin-resistant *Staphylococcus aureus*. *CoNS*, coagulase-negative *Staphylococcus aureus*; *sp.*, species.
